# Supplementary material for: A synthetic-lethality RNAi screen reveals an ERK-mTOR co-targeting pro-apoptotic switch in PIK3CA+ oral cancers
Source: PubMed Central journal article supplement (PMC4905432; doi:10.18632/oncotarget.7372), 2016-02-13
Supplement: oncotarget-07-10696-s001.pdf [file oncotarget-07-10696-s001.pdf]

# A synthetic-lethality RNAi screen reveals an ERK-mTOR co-targeting pro-apoptotic switch in *PIK3CA*<sup>+</sup> oral cancers

## Supplementary Material

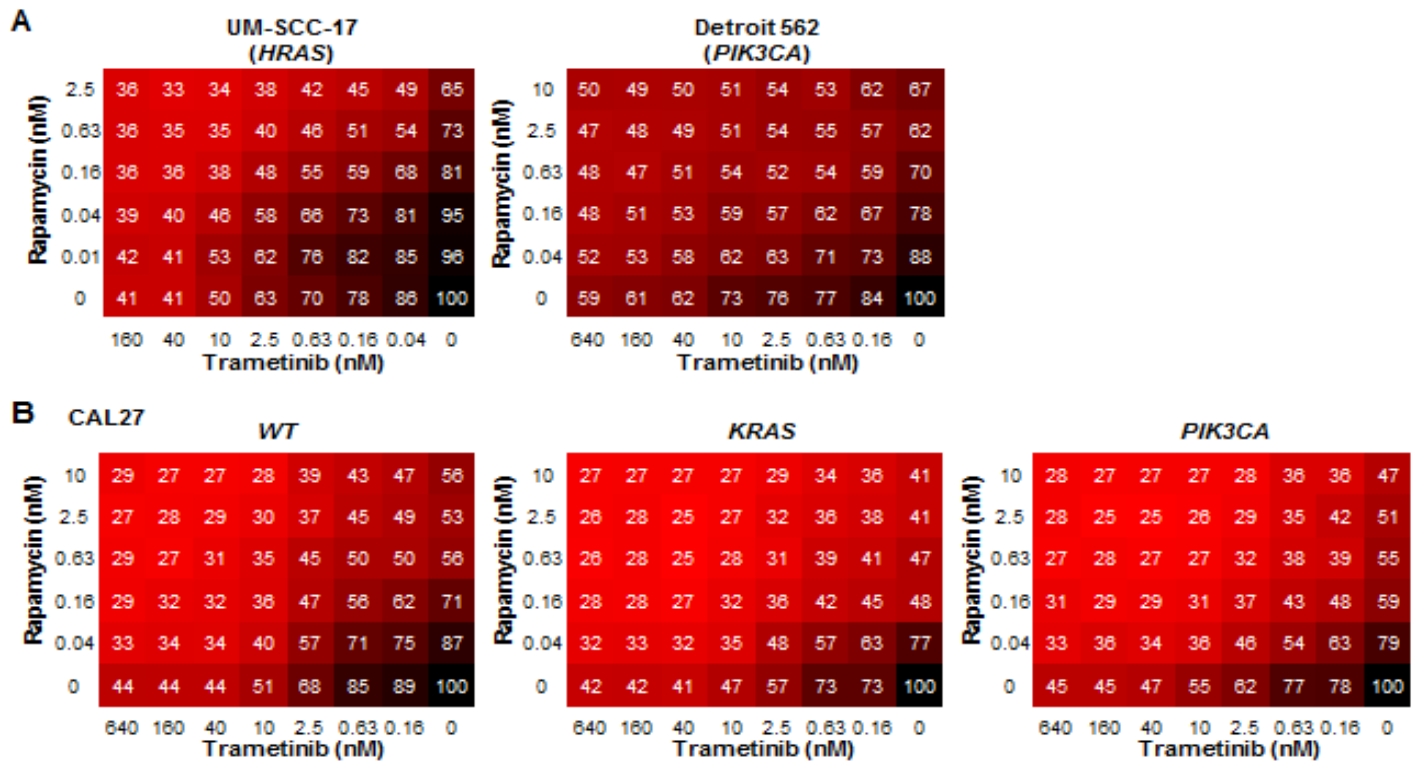

**Supplementary Figure S1:** Factorial dose matrix combinatorial drug treatment against UM-SCC-17B and Detroit 562 (A), and CAL27 WT, CAL27 RAS and CAL27 PIK3CA (B). Indicated cells were incubated for 72 hrs with indicated concentrations of drugs. Numbers on the matrix indicate % Cell Viability (n=3).

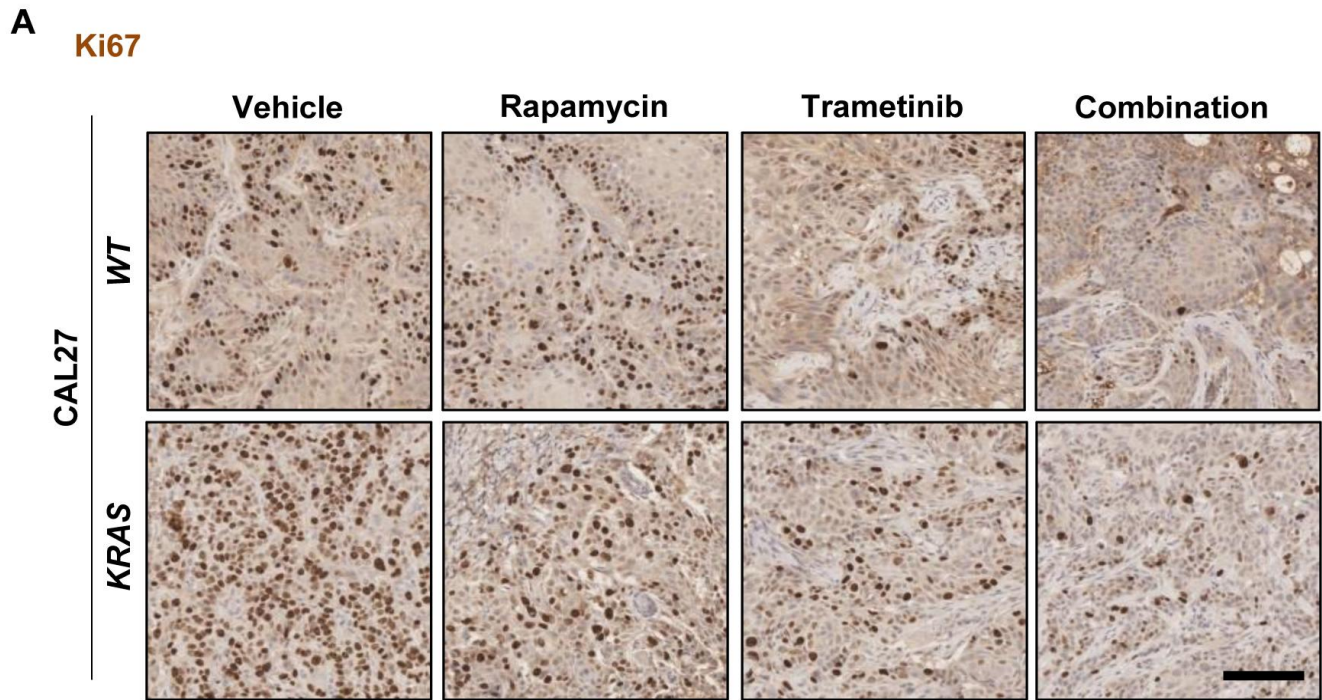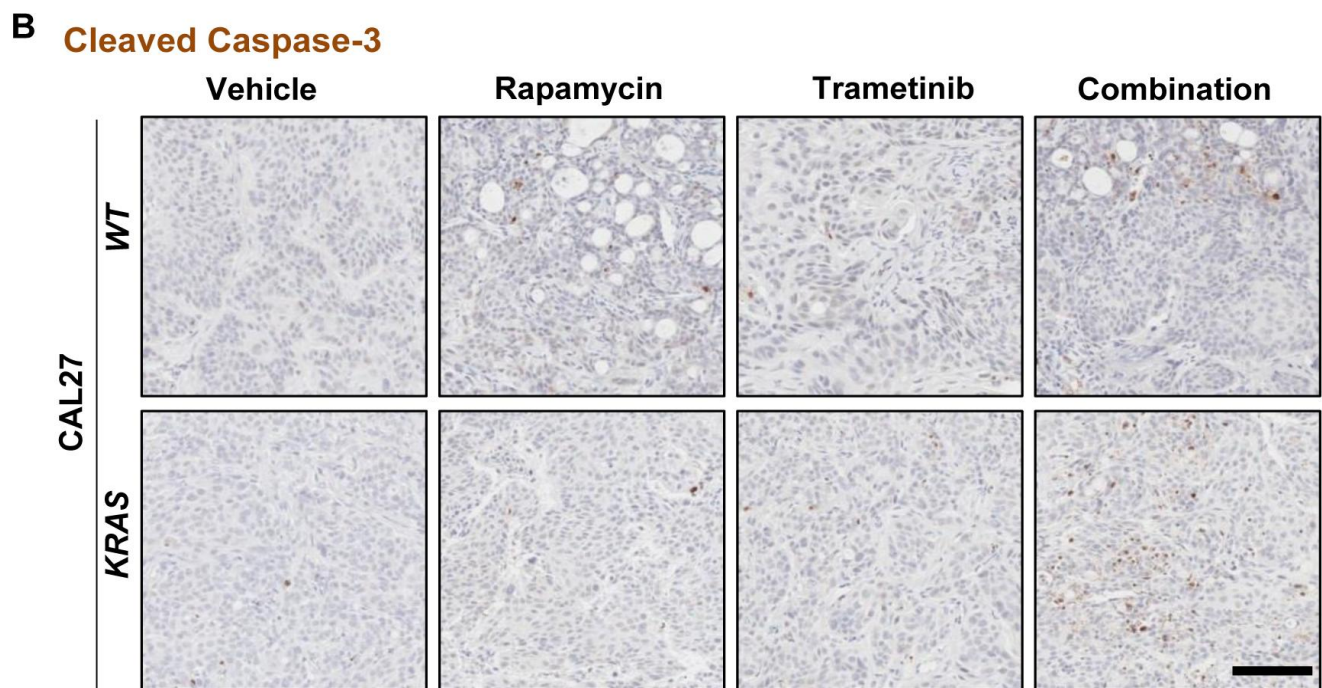

**Supplementary Figure S2:** Representative tumor tissue sections stained for Ki67 (A) and cleaved caspase-3 (B). Scale bars represent 100  $\mu$ m.
